# Supplementary material for: Selective HDAC6 inhibitors improve anti-PD-1 immune checkpoint blockade therapy by decreasing the anti-inflammatory phenotype of macrophages and down-regulation of immunosuppressive proteins in tumor cells
Source: PubMed Central journal article supplement (PMC6467894; doi:10.1038/s41598-019-42237-3), 2019-04-16

**Selective HDAC6 inhibitors improve anti-PD-1 immune checkpoint blockade therapy by decreasing the anti-inflammatory phenotype of macrophages and down-regulation of immunosuppressive proteins in tumor cells.**

Tessa Knox<sup>1#</sup>, Eva Sahakian<sup>2#</sup>, Debarati Banik<sup>1</sup>, Melissa Hadley<sup>1</sup>, Erica Palmer<sup>1</sup>, Satish Noonepalle<sup>1</sup>, Jennifer Kim<sup>1</sup>, John Powers<sup>2</sup>, Maria Gracia-Hernandez<sup>1</sup>, Vasco Oliveira<sup>3</sup>, Fengdong Cheng<sup>1</sup>, Jie Chen<sup>1</sup>, Cyril Barinka<sup>4</sup>, Javier Pinilla-Ibarz<sup>2</sup>, Norman H. Lee<sup>1</sup>, Alan Kozikowski<sup>5</sup>, and Alejandro Villagra<sup>1\*</sup>

**Supplementary Figure 1. HDAC6 selective inhibitors modulate immune-regulatory mediators without inducing cytotoxicity.**

(A) NextA (5 $\mu$ M) and untreated murine SM1 melanoma cells were incubated with IFN $\gamma$  for 24hrs, and the expression of PD-L1, PD-L2, and tubulin were evaluated by immunoblot. (B) Similarly, SM1 cells were treated with NextA (5 $\mu$ M) and the expression of HDAC6, ac-tubulin, galectin-9, ICOSL, CD70, B7-H3, B7-H4, and tubulin evaluated by immunoblot. (C) Lung tissue from HDAC6 knock-out or wild type mice was screened for the expression of the proteins noted in the figure.

**Supplementary Figure 2. HDAC6i and anti-PD-1 blocking antibody decrease tumor growth in a dose dependent manner.**

(A) C57BL/6 mice were treated by intraperitoneal injection 5 times a week with a vehicle control or NextA at the various doses indicated in order to determine the optimal treatment dose. (B) C57BL/6 Mice were treated by intraperitoneal injection 3 times a week with mAb anti-PD1 at the various doses indicated in order to determine the optimal treatment dose. (C) Mice were given intraperitoneal injections 5 times a week with Isotype IgG2 at 15 mg/kg or a vehicle control and tumor growth monitored for 21 days.

**Supplementary Figure 3. Inhibition of HDAC6 improves immune check-point blockade.**

(A) C57BL/6 mice were subcutaneously injected with 1x10<sup>6</sup> B16-F10 murine melanoma tumor cells. Mice were treated with a vehicle control, 15 mg/kg anti-PD-1, 25 mg/kg NextA, or a combination of both agents. (B) Kaplan-Meier survival plot of the previous study. (C) Individual group plots representation for the previous study.

**Supplementary Figure 4. NextA modulates the expression of immune-regulatory mediators.**

C57BL/6 mice were subcutaneously injected with 1x10<sup>6</sup> SM1 murine melanoma tumor cells. Mice were treated with a vehicle control, 15 mg/kg anti-PD-1, 25 mg/kg NextA, or a combination of both agents for 30 days. The NextA pre-treatment condition noted in the figure started 10 days before other conditions. Tumors were collected at the study end-point and the expression of PD-L1, PD-L2, B7-H3, OX40L, galectin-9 and ICOSL was evaluated by qRT-PCR (A-F). Similarly, the presence of CD80, CD86, CD70, HVEM, Gal9, ICOSL, B7-H3, and B7-H4 was evaluated by flow cytometry (G-N).

**Supplementary Figure 5. HDAC6 knock-down diminish tumor growth.**

(A) Individual group plots representation for the in vivo study depicted in figure 4E. C57BL/6 mice were subcutaneously injected with 1x10<sup>6</sup> SM1 murine melanoma cells lacking HDAC6 (HDAC6KD) or control cells (non-target). Tumor nodules were isolated to evaluate CD8+ and CD4+ infiltration (B), and the presence of PD-1, LAG-3 and TIM3 (C). HDAC6<sup>-/-</sup> mice were subcutaneously injected with 1x10<sup>6</sup> SM1 murine melanoma tumor cells. Tumor nodules were isolated to evaluate CD8+ and CD4+ infiltration (D), and the presence of PD-1, LAG-3 and TIM3 (E).

**Supplementary Figure 6. Macrophage depletion impairs tumor growth.**

1x10<sup>6</sup> SM1 cells were injected subcutaneously in the flanks of C57/Bl6 mice. When tumors became palpable, mice were injected intratumorally with Clodrosomes or Encapsomes (vehicle) for two weeks. The composition of M1, M2, DC, and T cells was evaluated from end-point tumors (F), and tumor growth measured during the two week of treatment (G).

**Supplementary Figure 7 and 8. Gating strategy for the tumor infiltrating lymphocyte flow cytometry panels.**

**Supplementary Figure 9 and 10. Representative cell counts for each condition shown in Figures 6B-M.**

Supplementary Figure 1

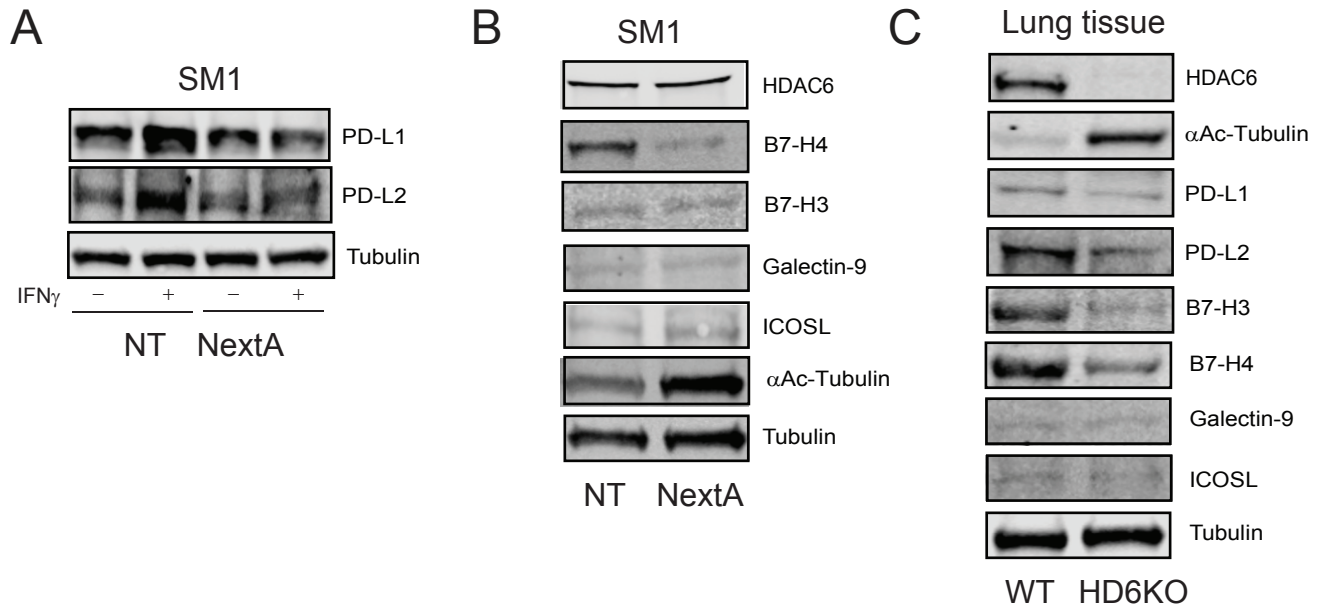

Supplementary Figure 2

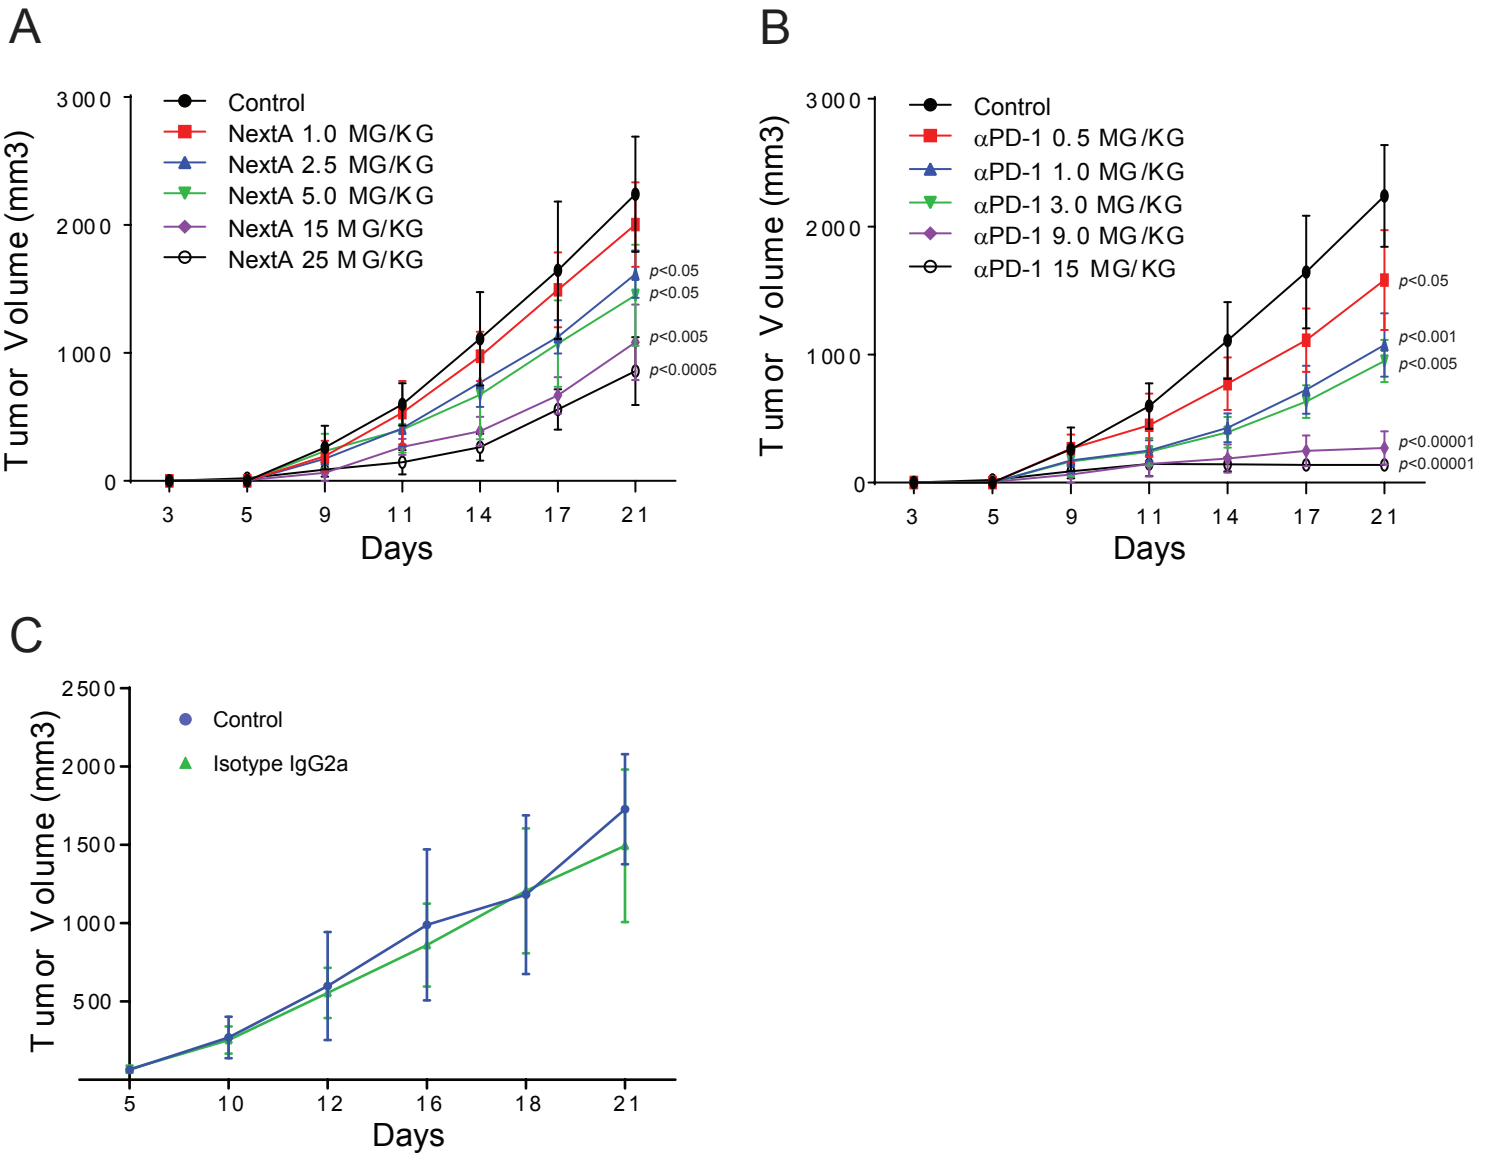

### Supplementary Figure 3

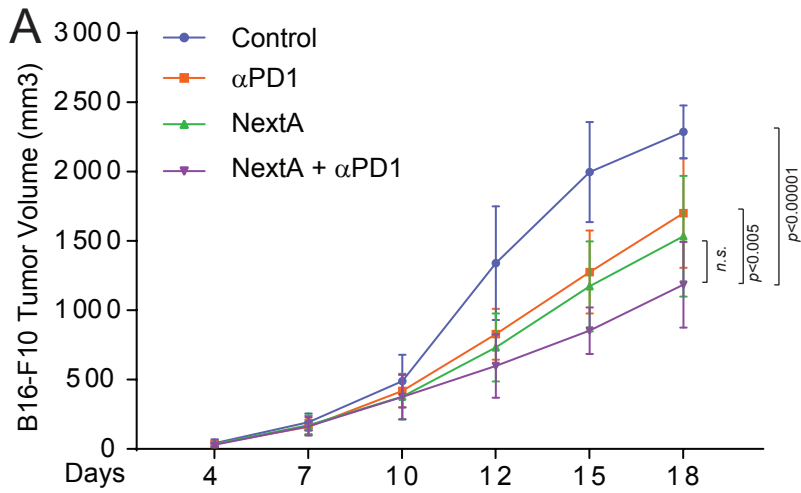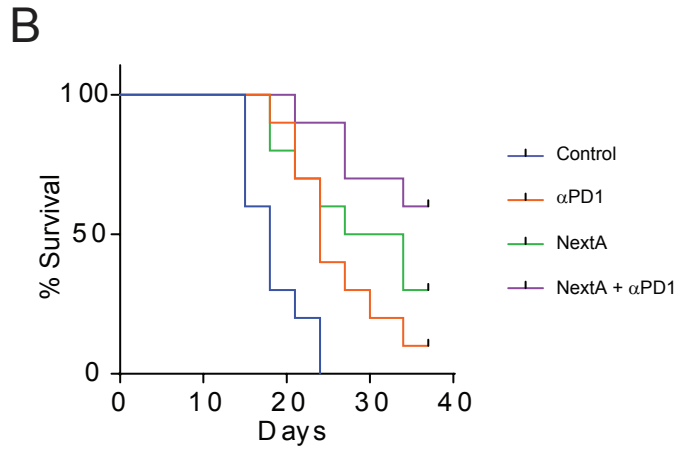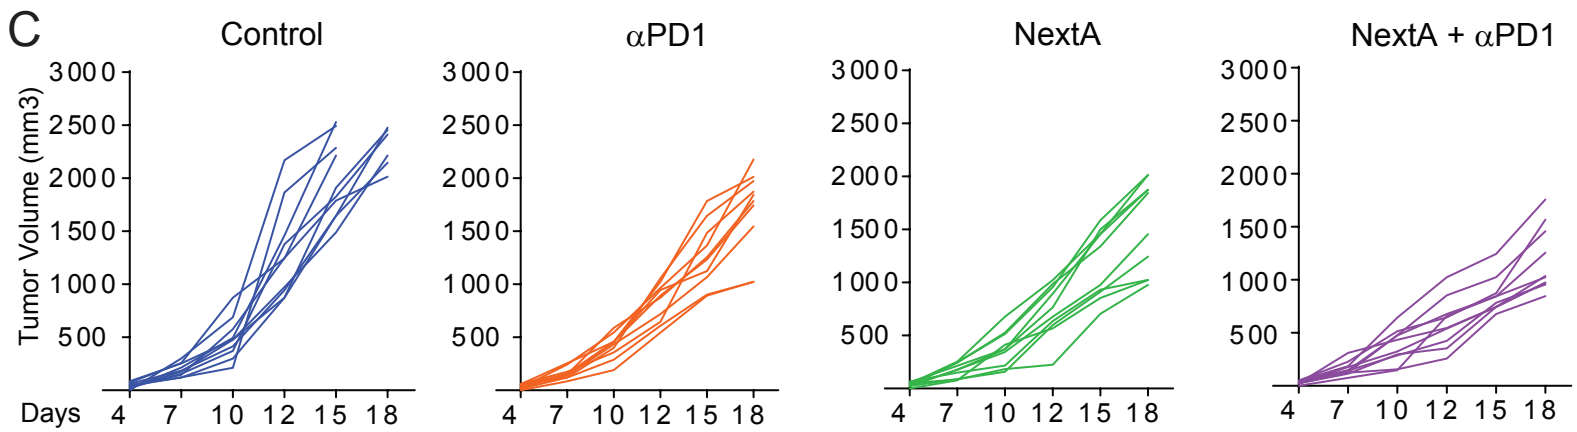

Supplementary Figure 4

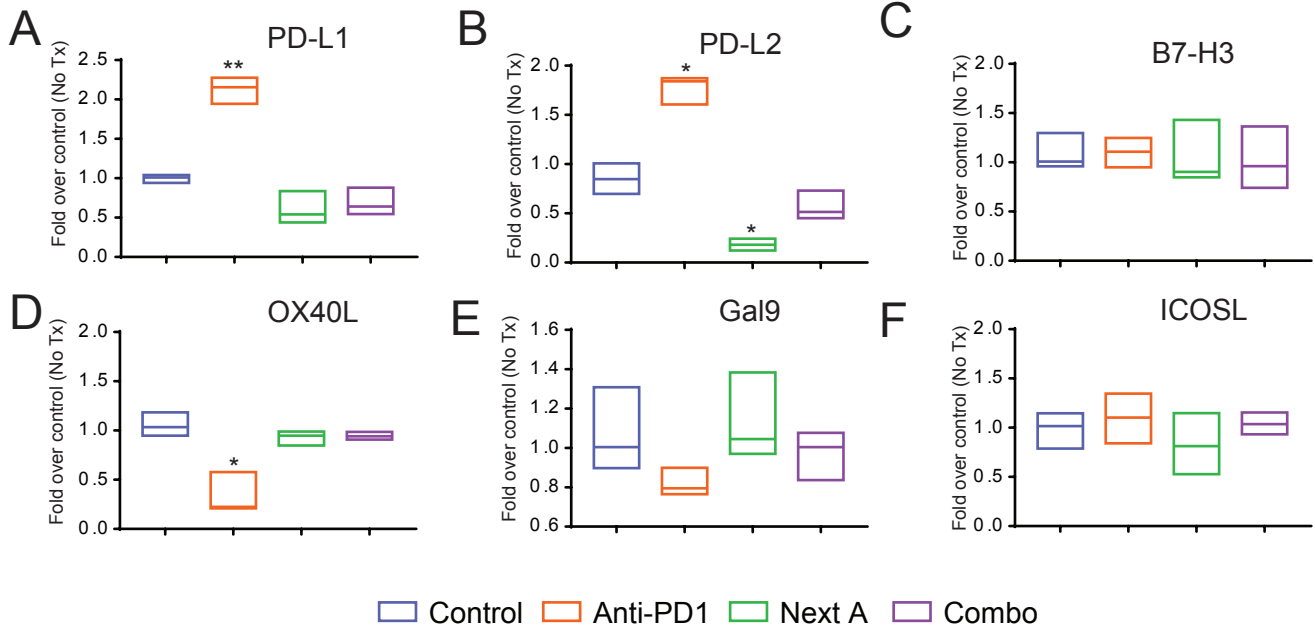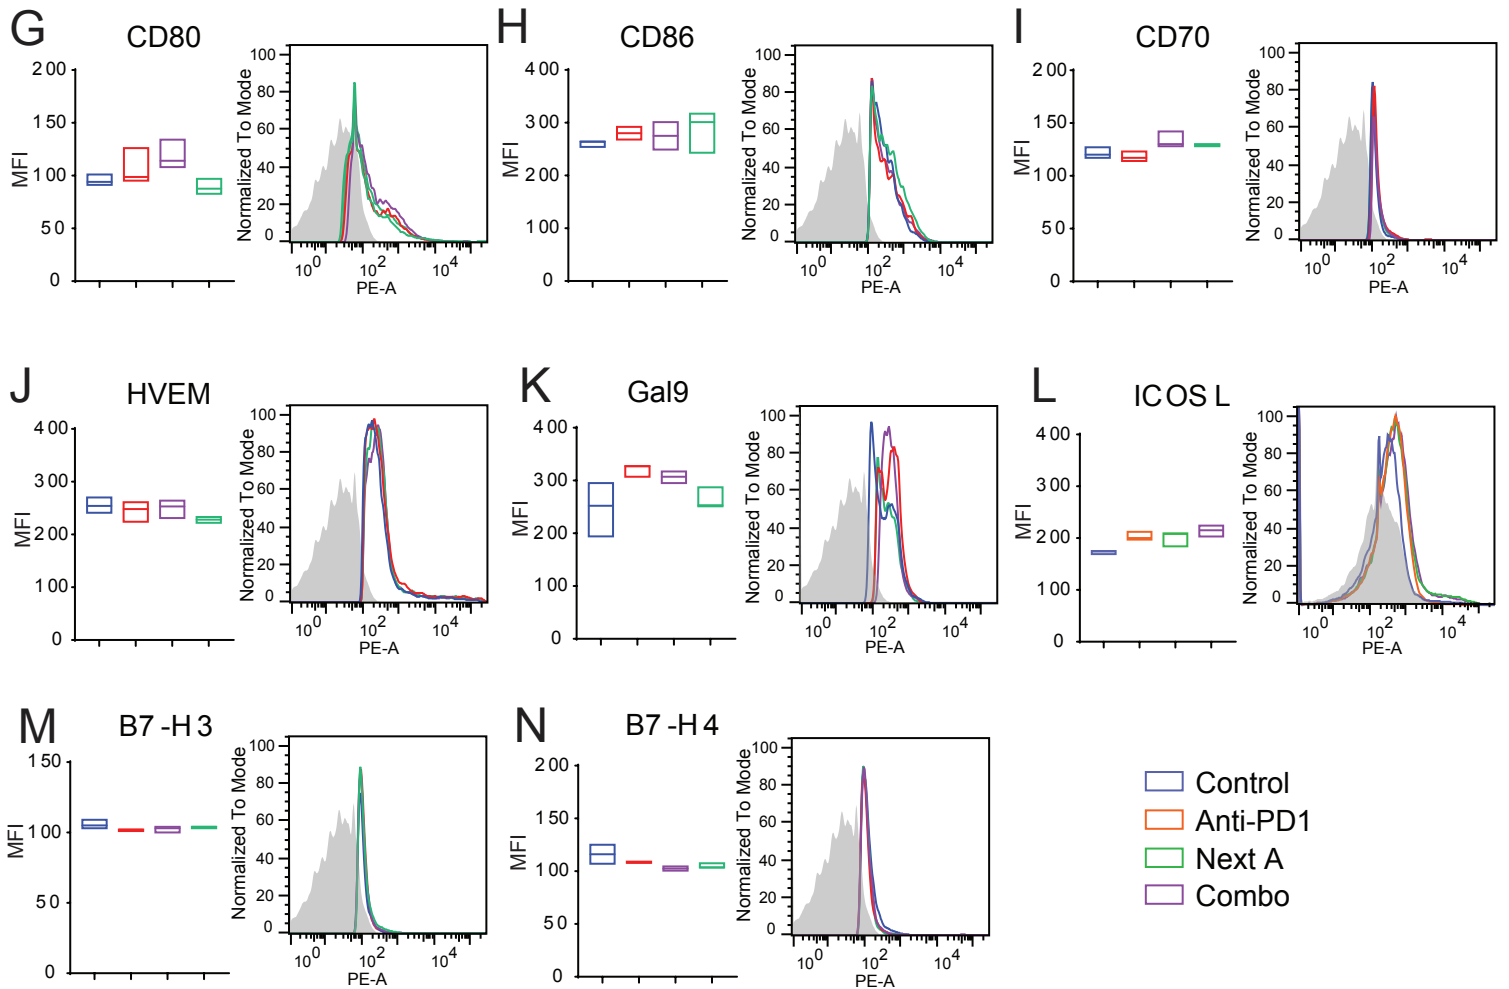

Supplementary Figure 5

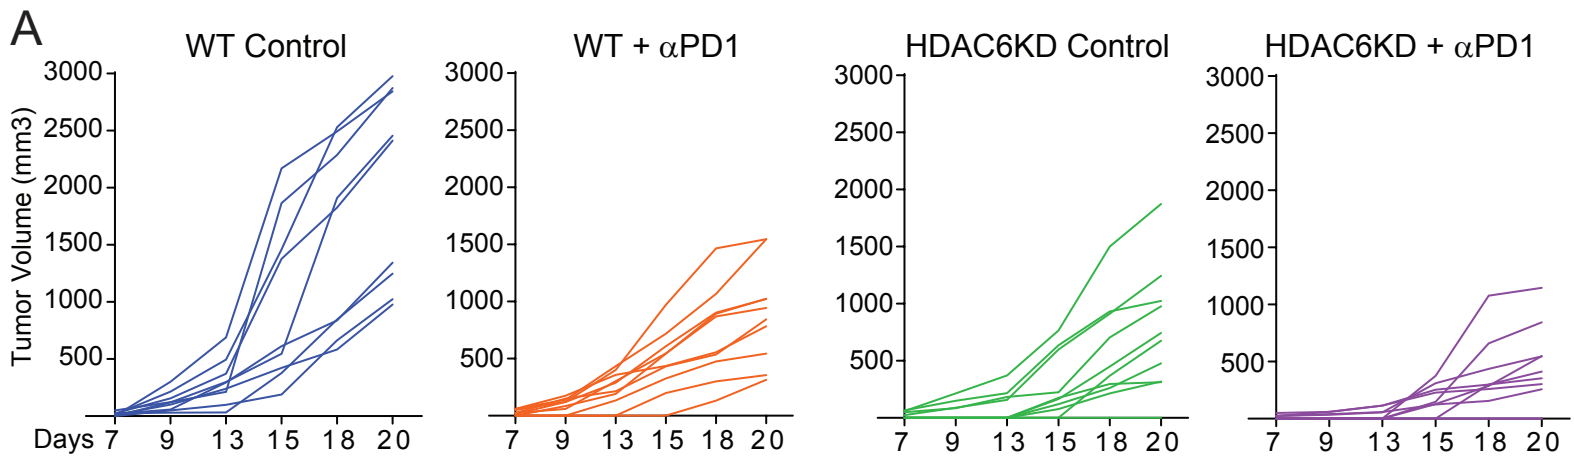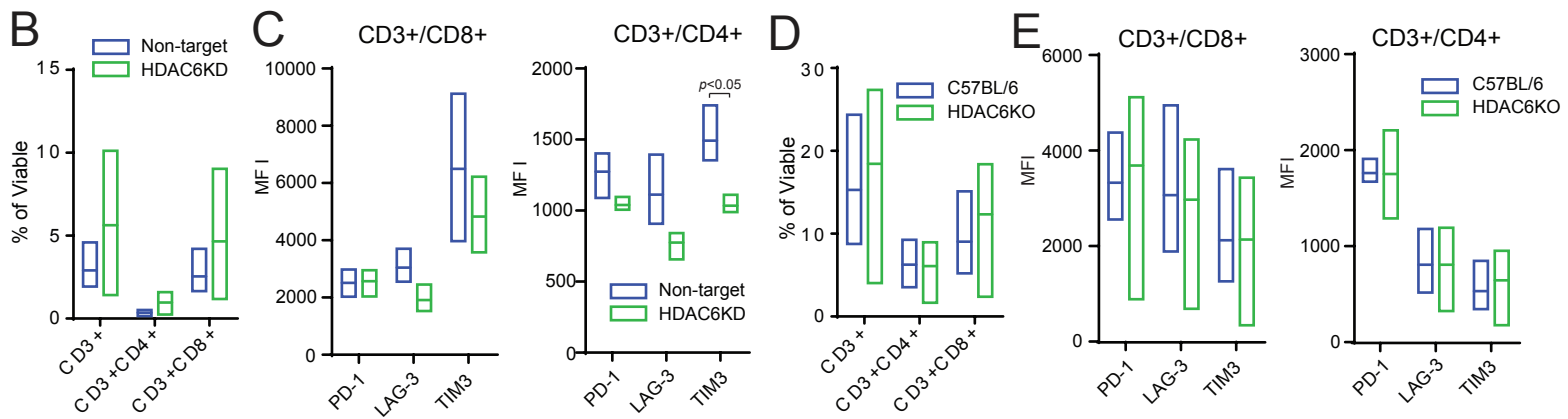

# Supplementary Figure 6

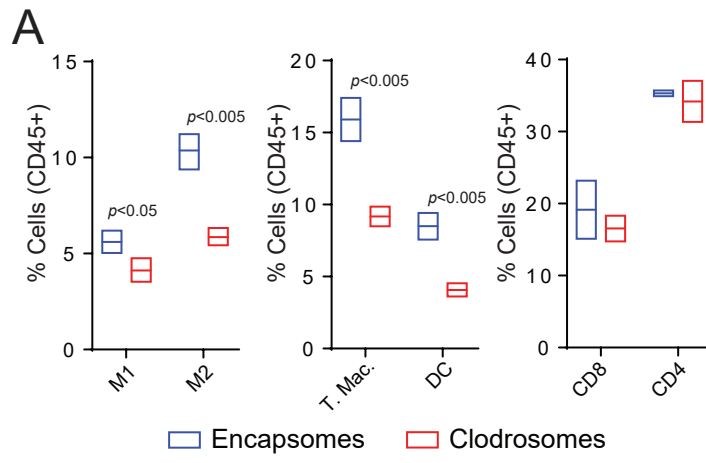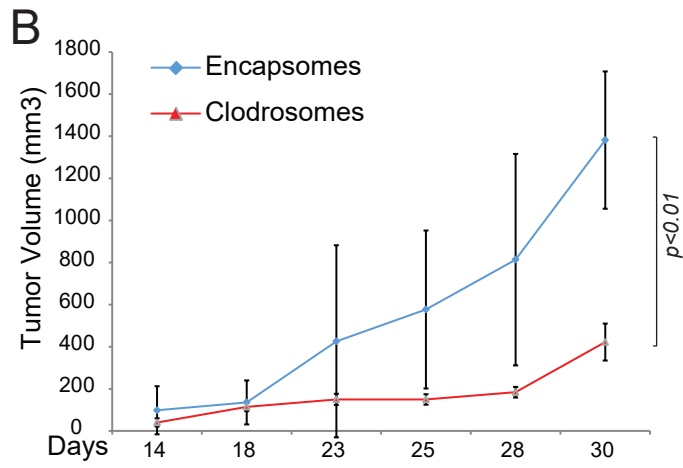



# Supplementary Figure 7

## Lymphoid

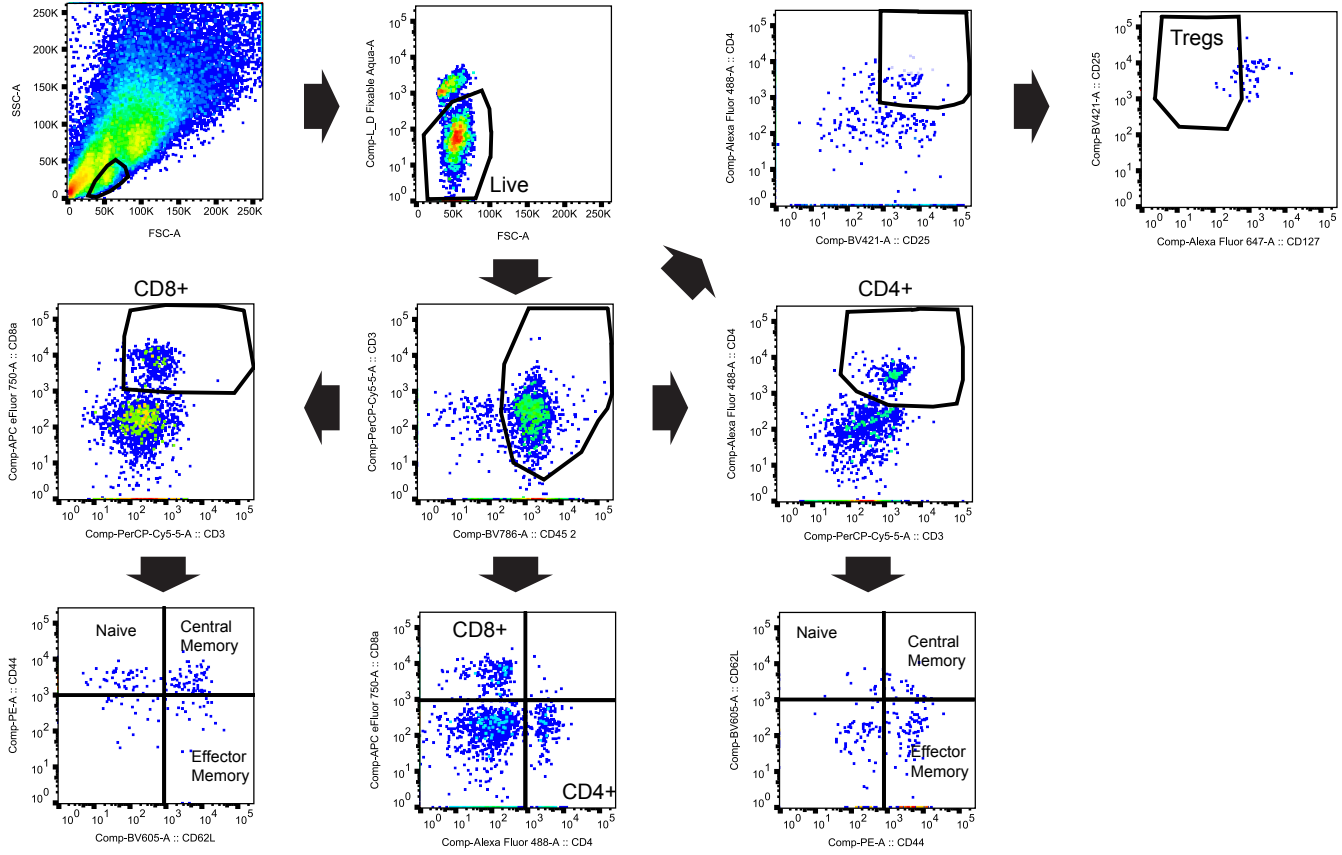

# Supplementary Figure 8

## NK

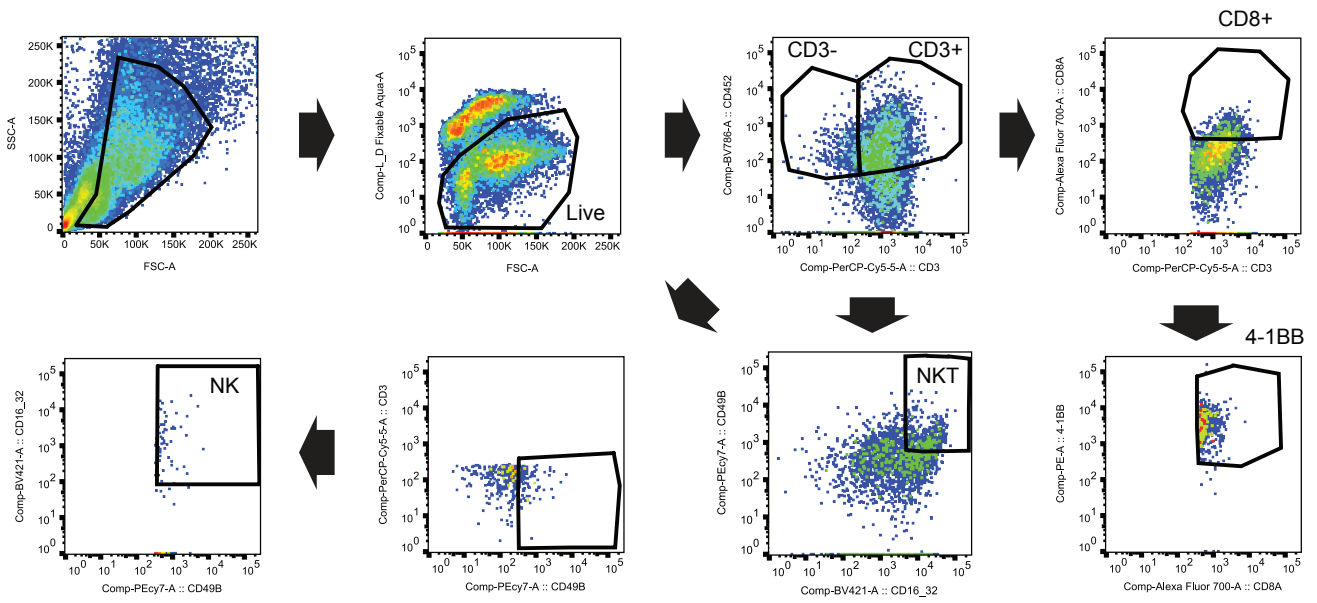

## Myeloid

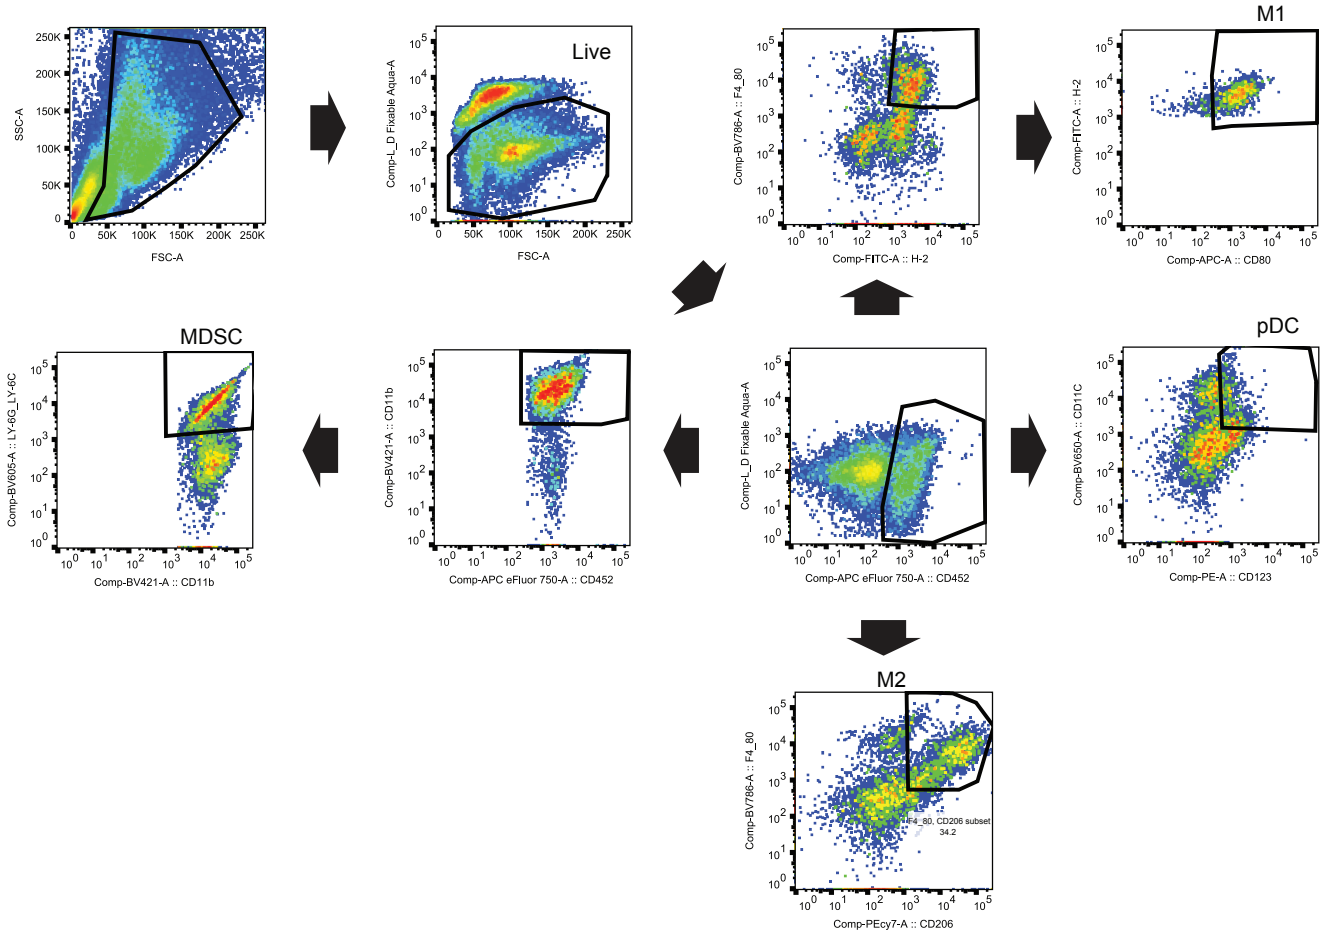

# Supplementary Figure 9

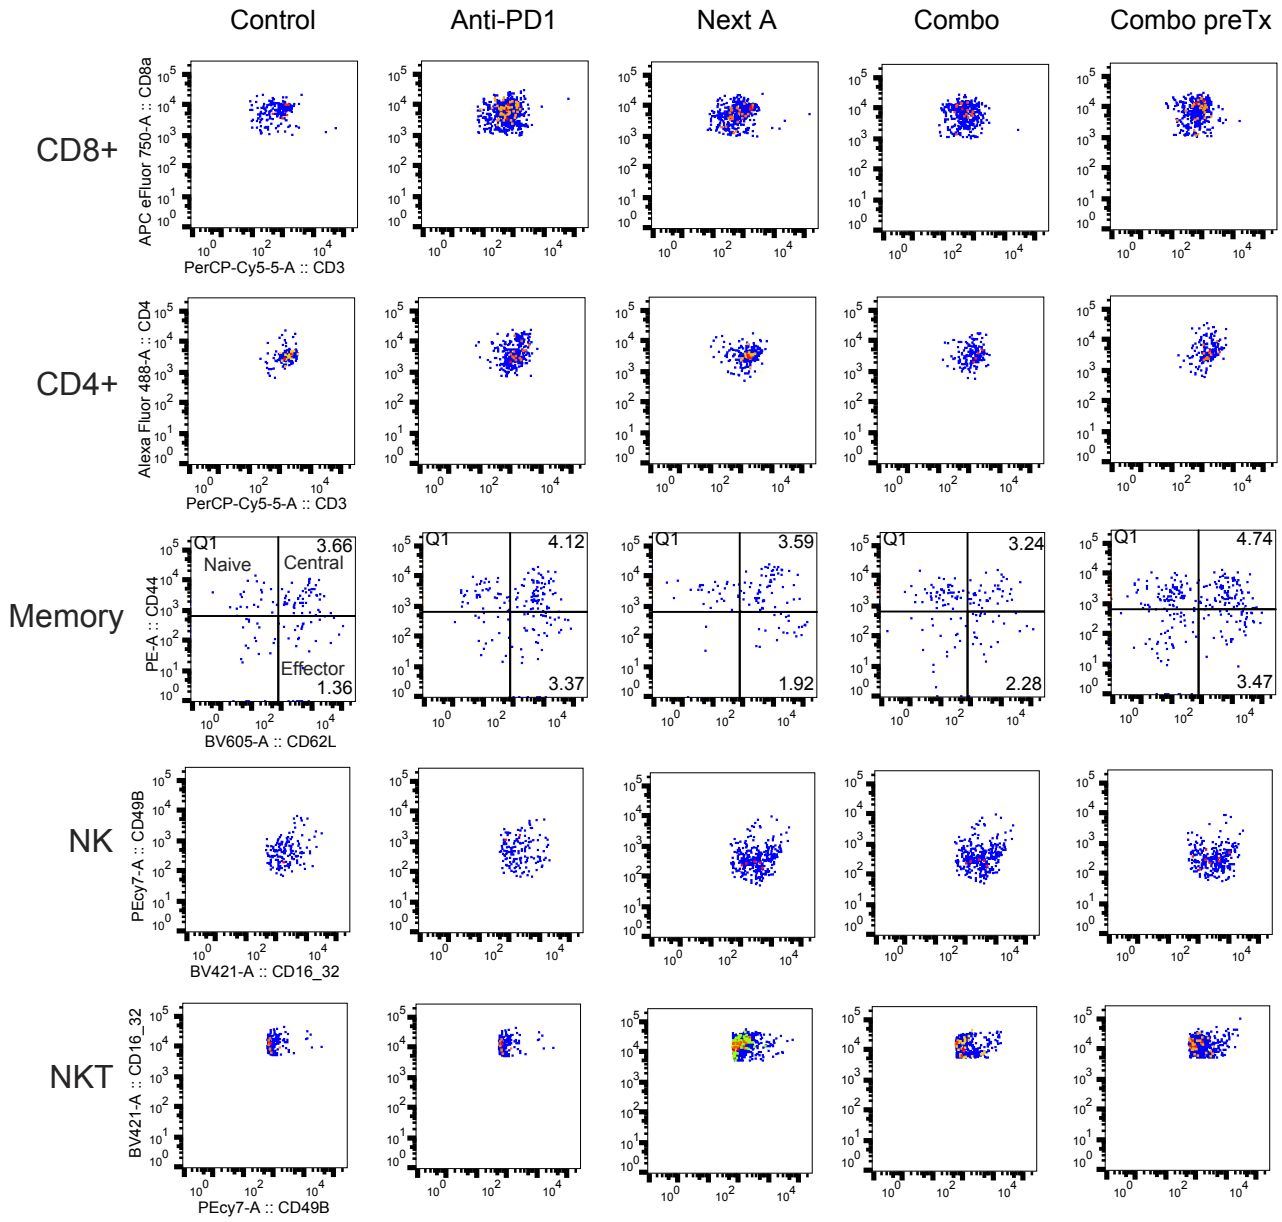

# Supplementary Figure 10

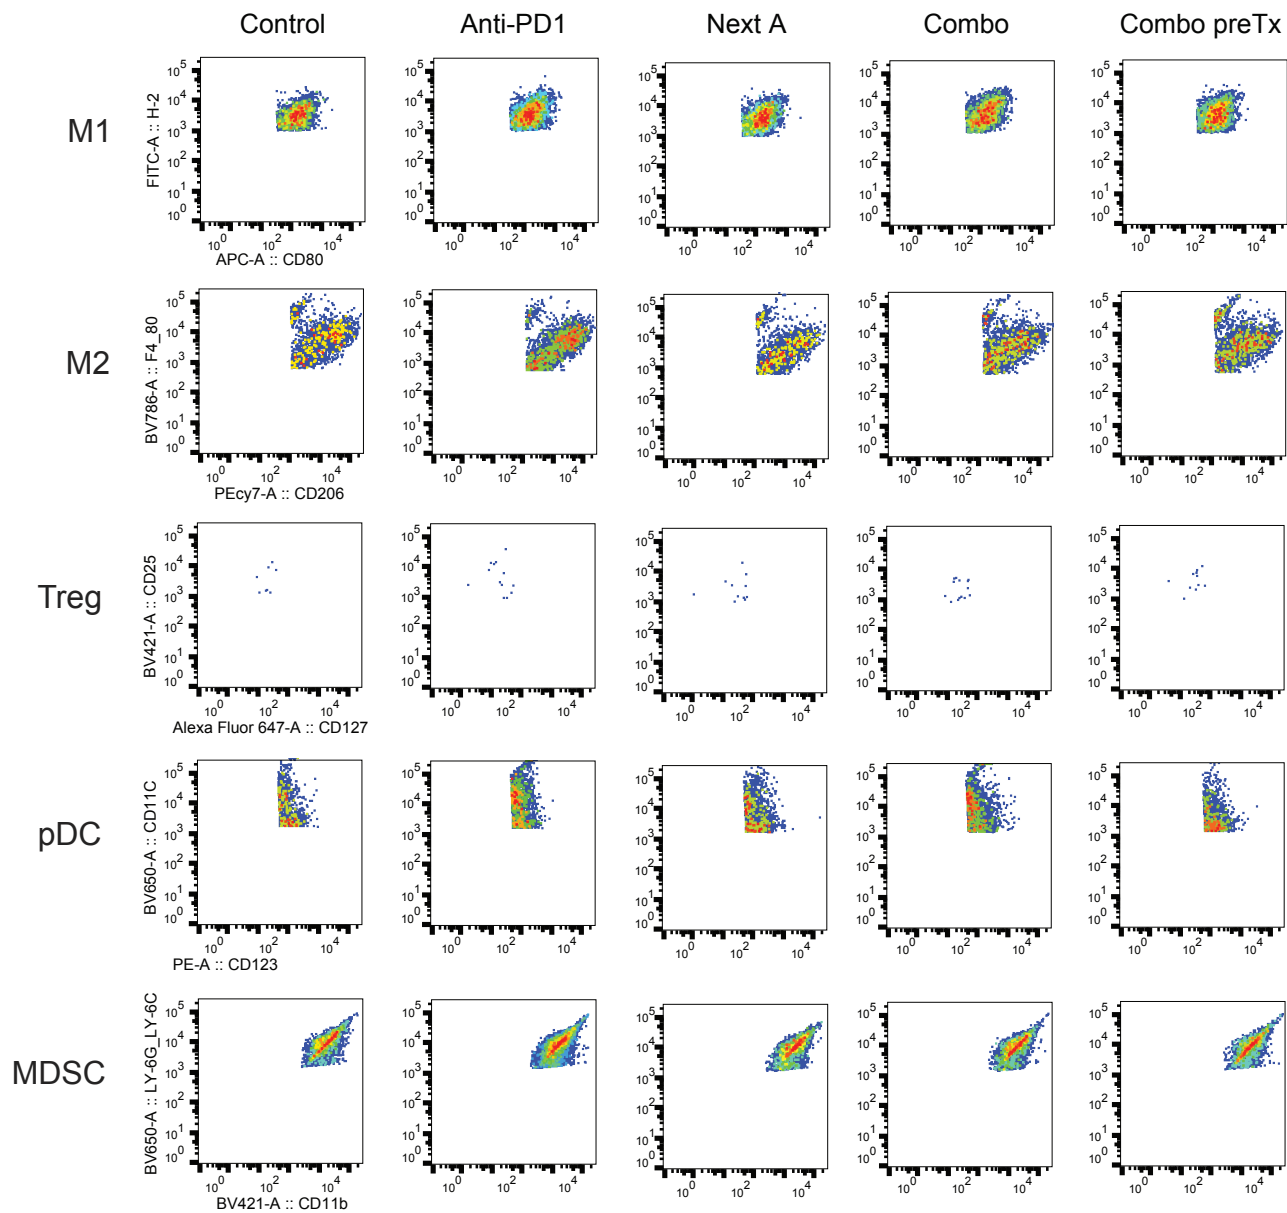

# Full images of western blots in Figure 1.C

1. Control 1
2. Control 2
3. Anti-PD1 antibody therapy 1
4. Anti-PD1 antibody therapy 2

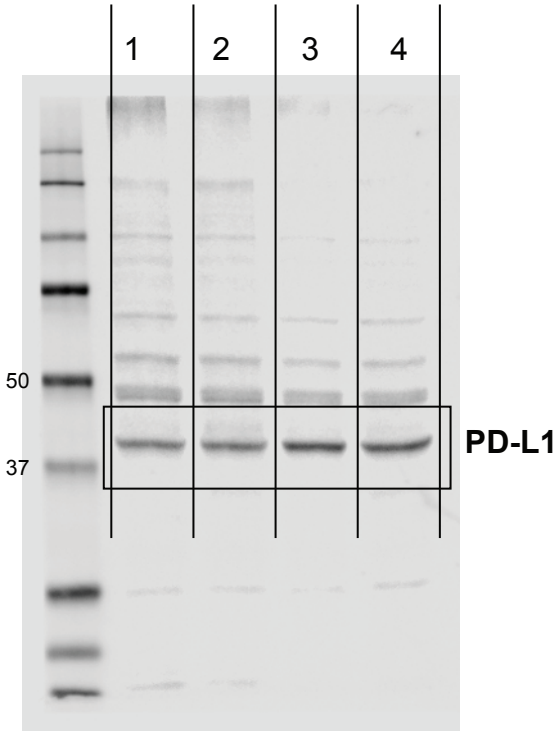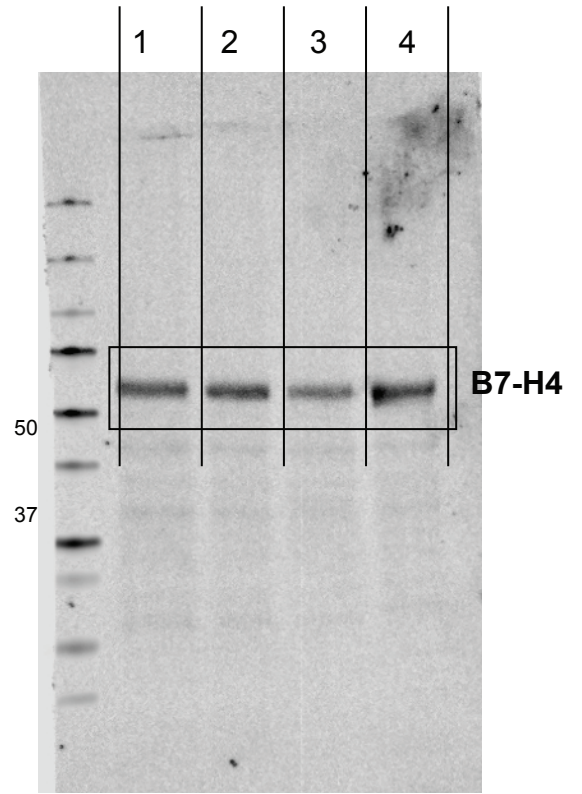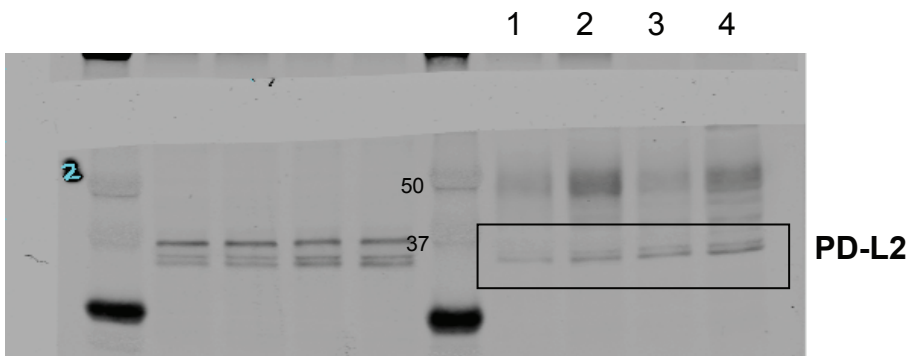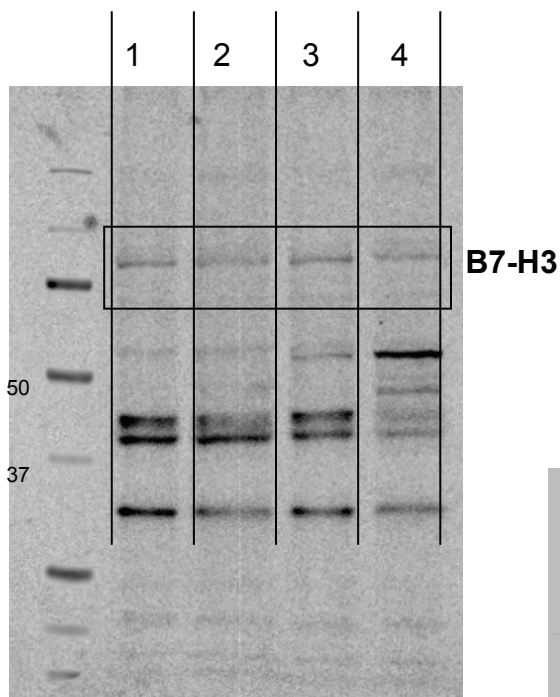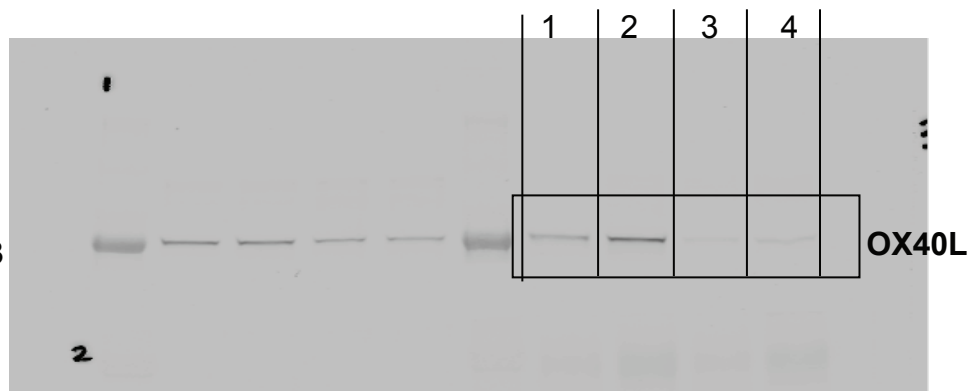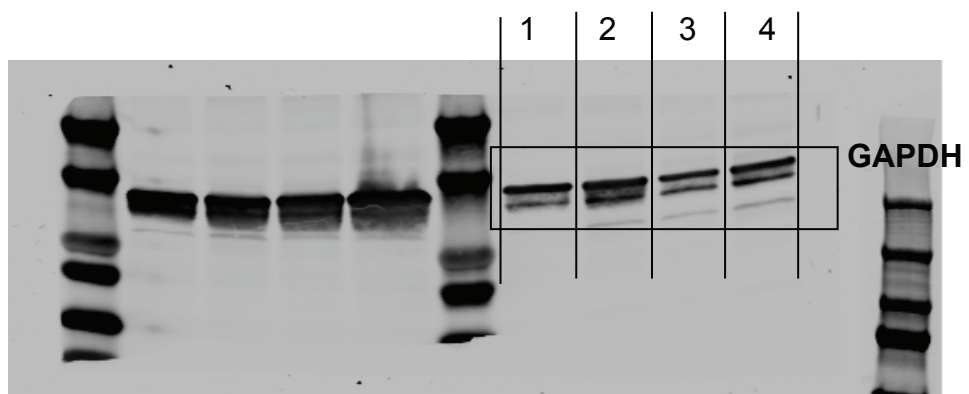

# Full images of western blots in Figure 2.1

1. Control
2. Anti-PD1 antibody therapy
3. Nexturastat A therapy
4. Combination therapy

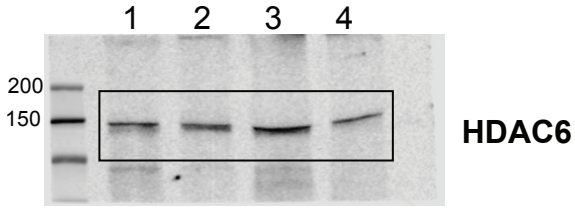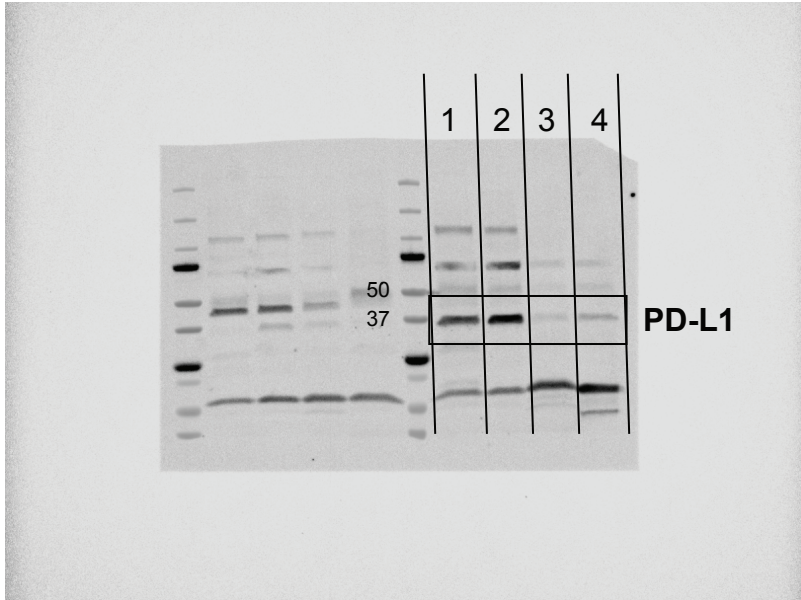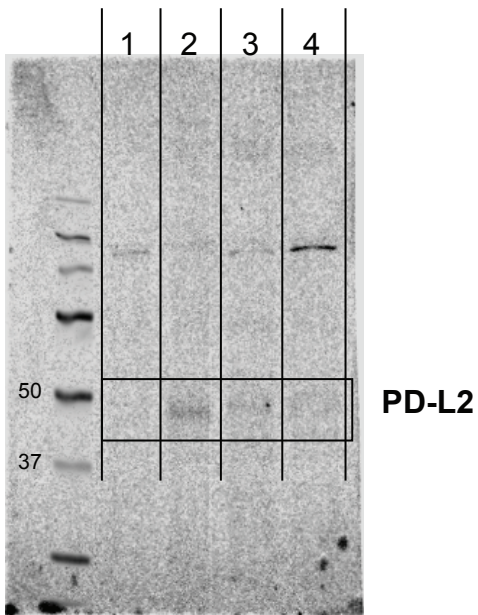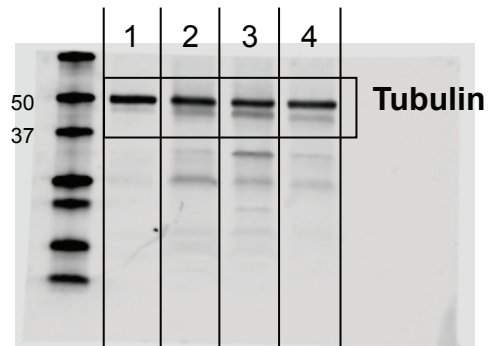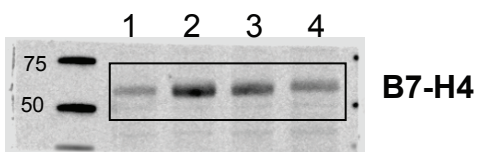

# Full images of western blots in Supplementary Figure 1

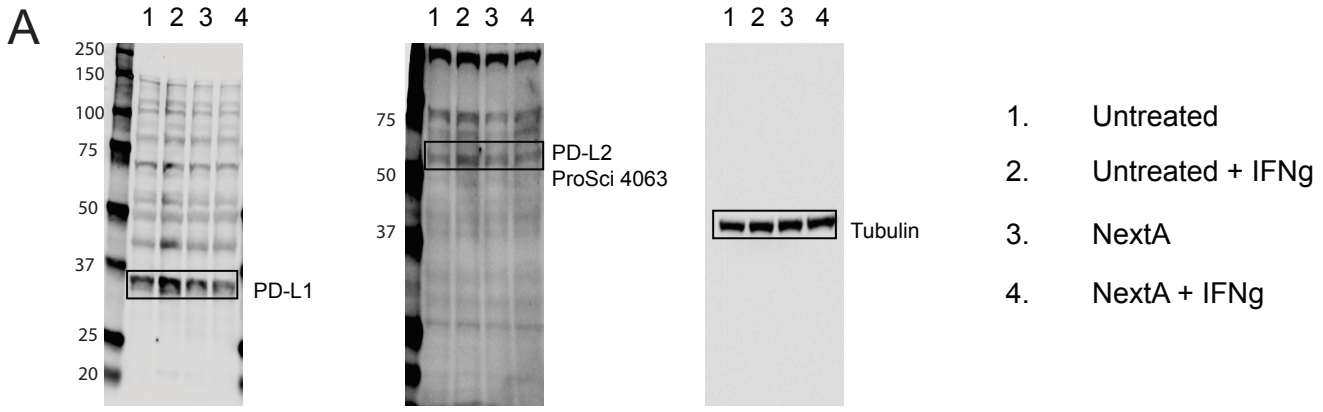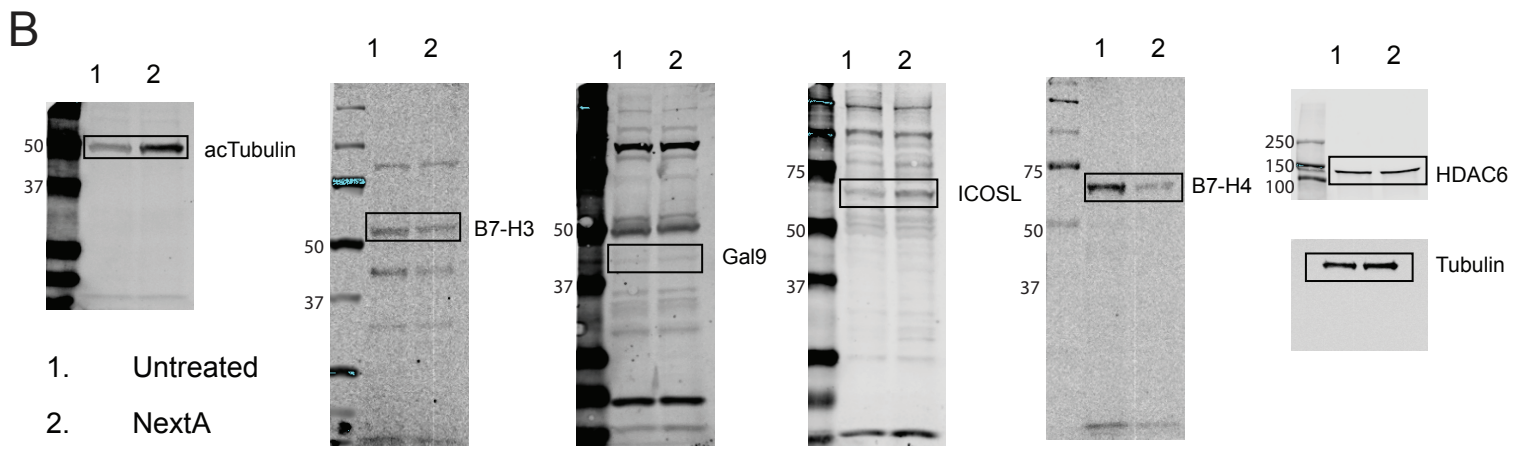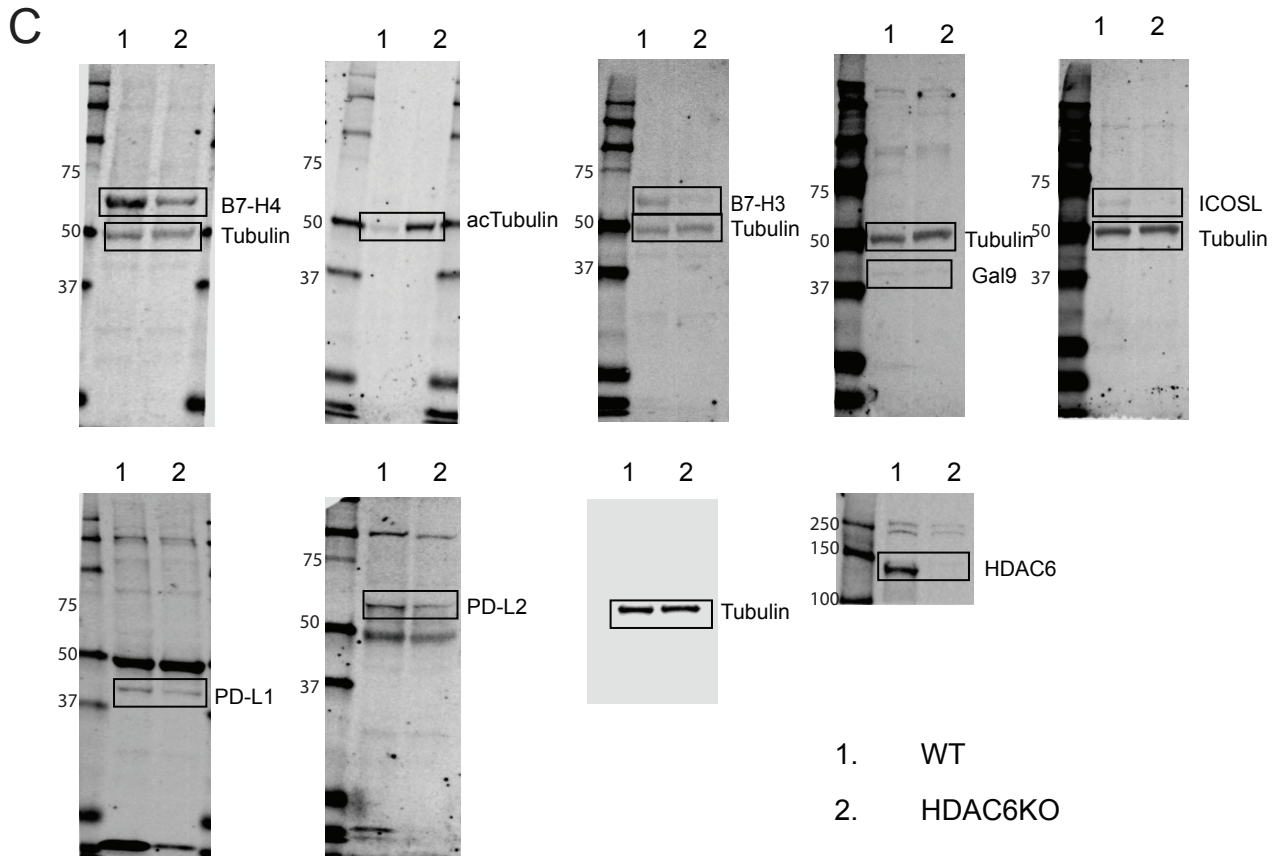

Supplement: 41598_2019_42237_MOESM1_ESM.pdf [file 41598_2019_42237_MOESM1_ESM.pdf]
